# Supplementary material for: Synthesis, Characterization, and Hydrogen Evolution Activity of Metallo-meso-(4-fluoro-2,6-dimethylphenyl)porphyrin Derivatives
Source: PubMed Central journal article supplement — ACS Omega. 2022 Mar 2;7(10):8988–94. doi: 10.1021/acsomega.2c00109 (PMC8928552; doi:10.1021/acsomega.2c00109), 2022-03-02
Supplement: ao2c00109_si_001.pdf [file ao2c00109_si_001.pdf]

## Supporting Information for

# Synthesis, Characterization, and Hydrogen Evolution Activity of Metallo-*meso*-(4-fluoro-2,6-dimethylphenyl)porphyrin Derivatives

Pallas Chou,<sup>†</sup> Lauren Kim,<sup>†</sup> Sammer M. Marzouk,<sup>†</sup> Rui Sun, Alaina C. Hartnett, Dilek K.  
Dogutan,<sup>\*</sup> Shao-Liang Zheng and Daniel G. Nocera<sup>\*</sup>

Department of Chemistry and Chemical Biology, Harvard University, 12 Oxford Street, Cambridge, MA  
02138, United States

<sup>†</sup> Authors contributed equally to this work

<sup>\*</sup>E-mail: [dkiper@fas.harvard.edu](mailto:dkiper@fas.harvard.edu); [dnocera@fas.harvard.edu](mailto:dnocera@fas.harvard.edu)

## Table of Contents

|                                                                                          |    |
|------------------------------------------------------------------------------------------|----|
| A. NMR Spectra                                                                           | S3 |
| <b>Figure S1.</b> $^1\text{H}$ NMR spectra of Ni(II)TFP and Zn(II)TFP                    | S3 |
| <b>Figure S2.</b> $^{19}\text{F}$ NMR spectra of Ni(II)TFP and Zn(II)TFP                 | S4 |
| B. Crystallography                                                                       | S5 |
| <b>Table S1.</b> Crystal data and structure refinement for <b>2H-TFP</b>                 | S5 |
| C. Photophysics                                                                          | S6 |
| <b>Figure S3.</b> Lifetime decays of the emission of Zn(II)TFP and 2H-TFP                | S6 |
| D. Electrochemistry                                                                      | S7 |
| <b>Figure S4.</b> Cyclic voltammogram of Ni(II)TFP in $\text{CH}_3\text{CN}$             | S7 |
| <b>Figure S5.</b> Plot of charge versus moles $\text{H}_2$                               | S7 |
| E. HER Catalysis                                                                         | S8 |
| <b>Table S2.</b> Parameters obtained from fits of linear scan voltammogram traces        | S8 |
| <b>Figure S6.</b> Plot providing reaction order of proton concentration on HER catalysis | S8 |

## A. NMR Spectra

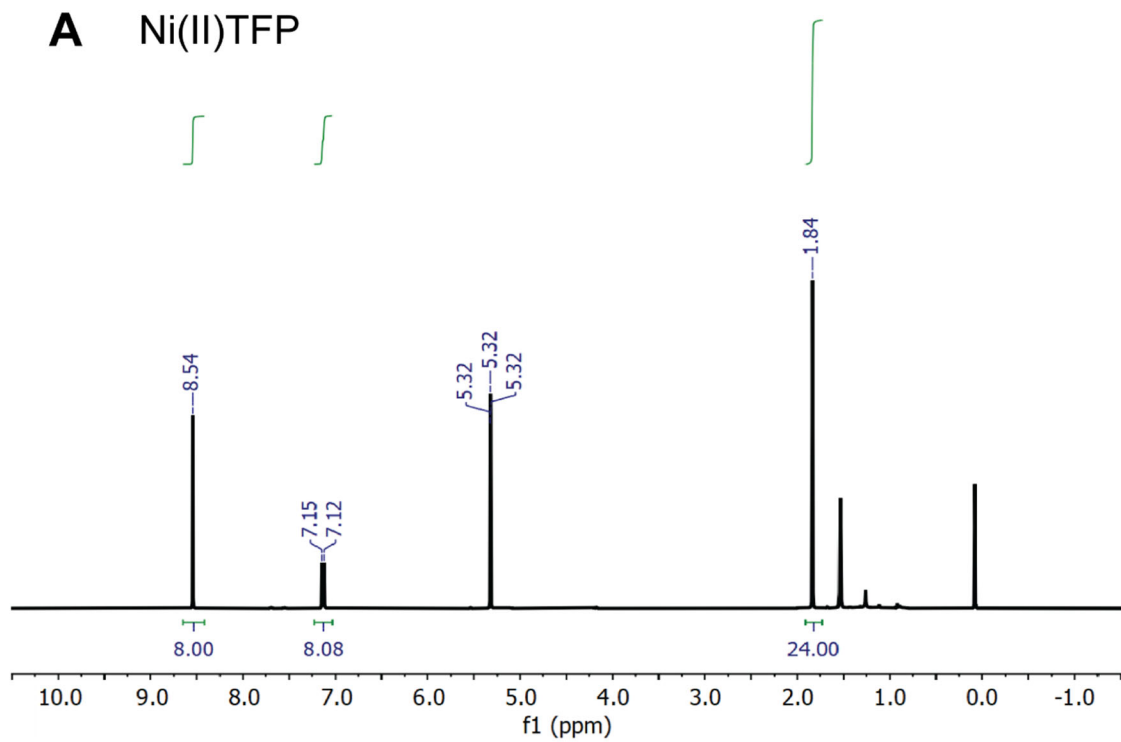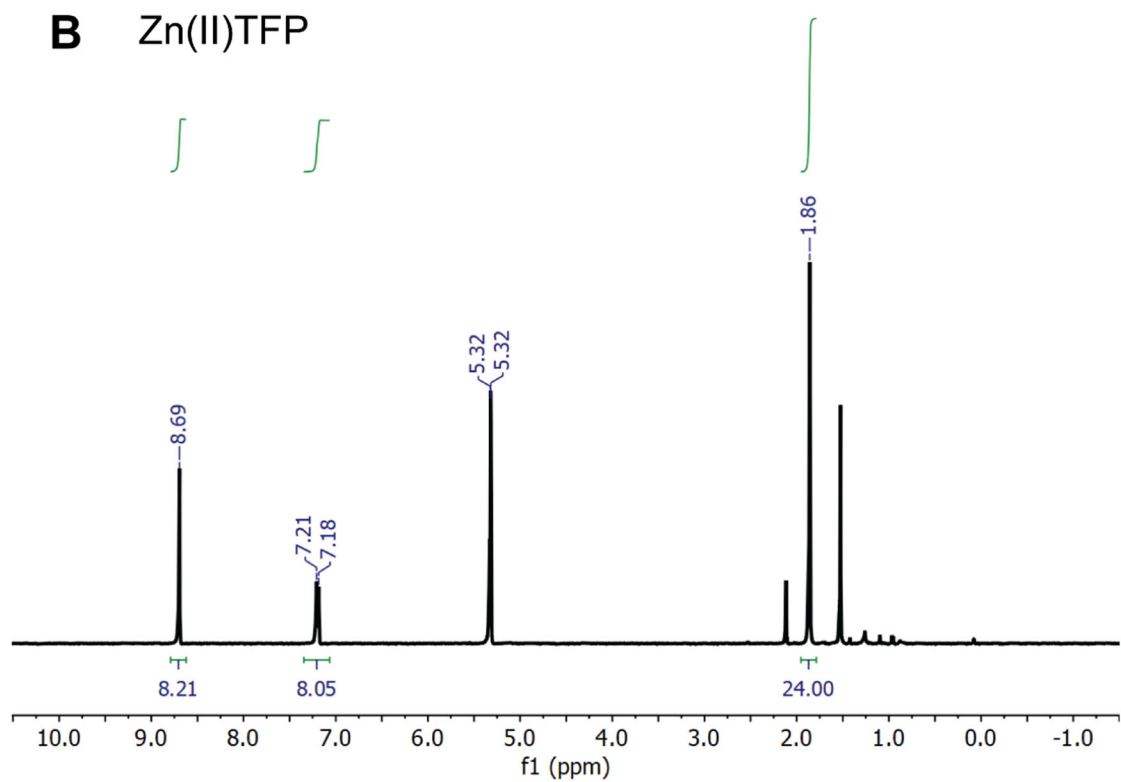

Figure S1.  $^1\text{H}$  NMR spectra of (A) Ni(II)TFP and (B) Zn(II)TFP in  $\text{DCM-d}_2$  solvent at 25 °C.

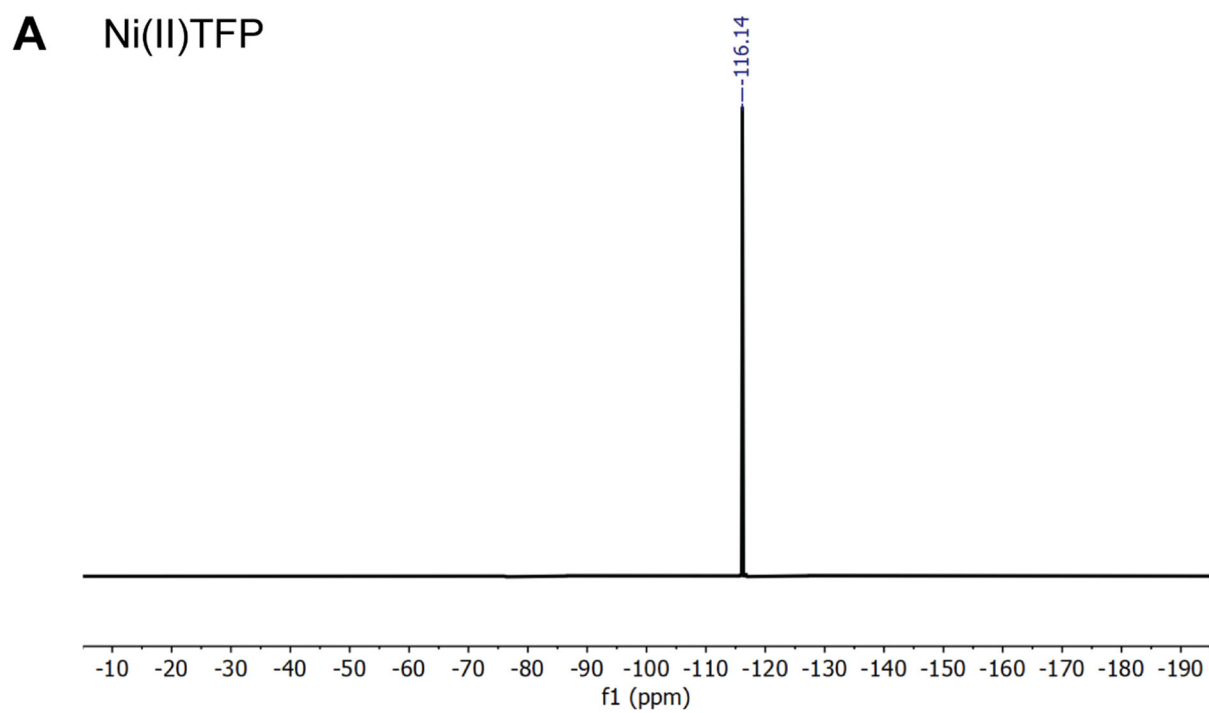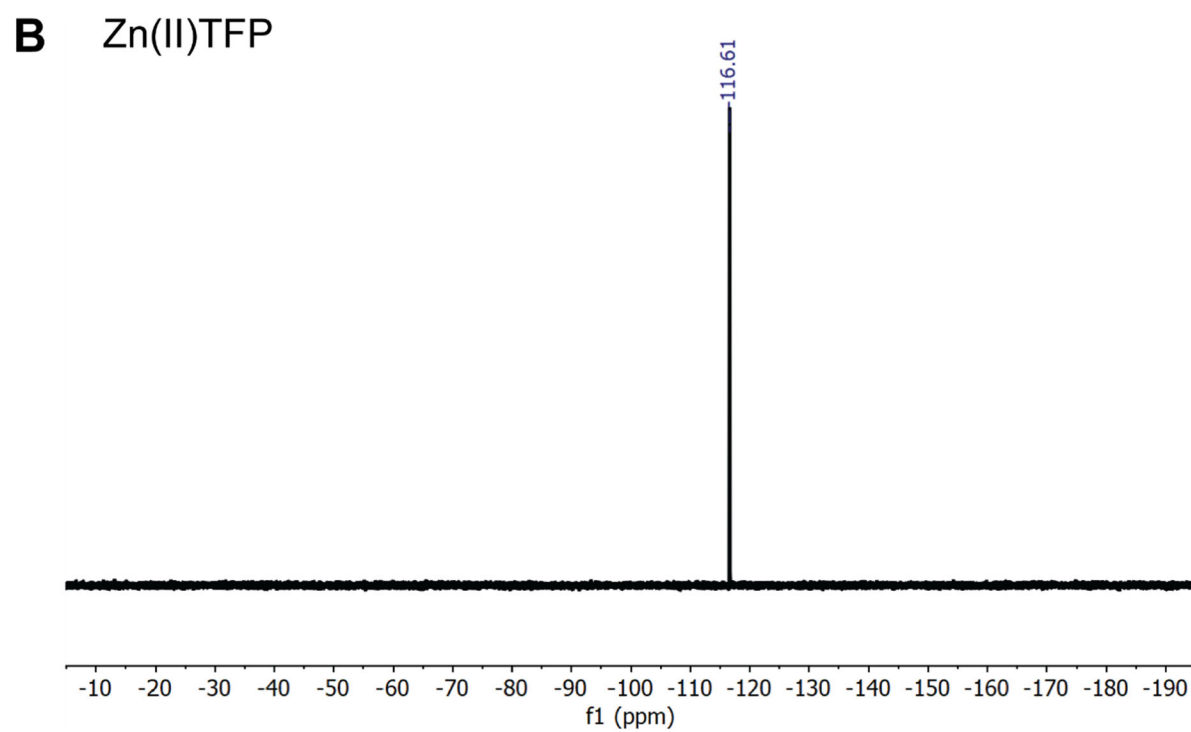

**Figure S2.**  $^{19}\text{F}$  NMR spectra of (A) Ni(II)TFP and (B) Zn(II)TFP in DCM- $d_2$  solvent at 25 °C.

## B. Crystallography

**Table S1.** Crystal data and structure refinement for 2H-TFP.

|                                               |                                                               |
|-----------------------------------------------|---------------------------------------------------------------|
| Empirical formula                             | C <sub>52</sub> H <sub>42</sub> F <sub>4</sub> N <sub>4</sub> |
| Formula weight                                | 798.89                                                        |
| T (K)                                         | 100(2)                                                        |
| $\lambda$ (Å)                                 | 1.54178                                                       |
| Crystal system                                | triclinic                                                     |
| Space group                                   | $P\bar{1}$                                                    |
| $a$ (Å)                                       | 9.2143(2)                                                     |
| $b$ (Å)                                       | 12.7406(3)                                                    |
| $c$ (Å)                                       | 12.6200(3)                                                    |
| $\alpha$ (°)                                  | 85.1670(10)                                                   |
| $\beta$ (°)                                   | 73.2420(10)                                                   |
| $\gamma$ (°)                                  | 71.7860(10)                                                   |
| $V$ (Å <sup>3</sup> )                         | 1347.51(5)                                                    |
| $Z$                                           | 1                                                             |
| $\rho_{\text{calcd}}$ (mg/m <sup>3</sup> )    | 0.984                                                         |
| $\mu$ (mm <sup>-1</sup> )                     | 0.548                                                         |
| $\theta$ range for data collection (°)        | 3.652 to 66.642                                               |
| Index ranges                                  | $-10 \leq h \leq 10, -15 \leq k \leq 15, 0 \leq l \leq 15$    |
| Reflections collected                         | 4572                                                          |
| Completeness to $\theta_{\text{max}}$         | 94.7%                                                         |
| Data/restraints/parameters                    | 4572 / 0 / 278                                                |
| GOF on $F^2$                                  | 1.086                                                         |
| R1                                            | 0.0528                                                        |
| wR2                                           | 0.1666                                                        |
| Largest diff. peak, hole (e Å <sup>-3</sup> ) | 0.23, -0.21                                                   |

## C. Photophysics

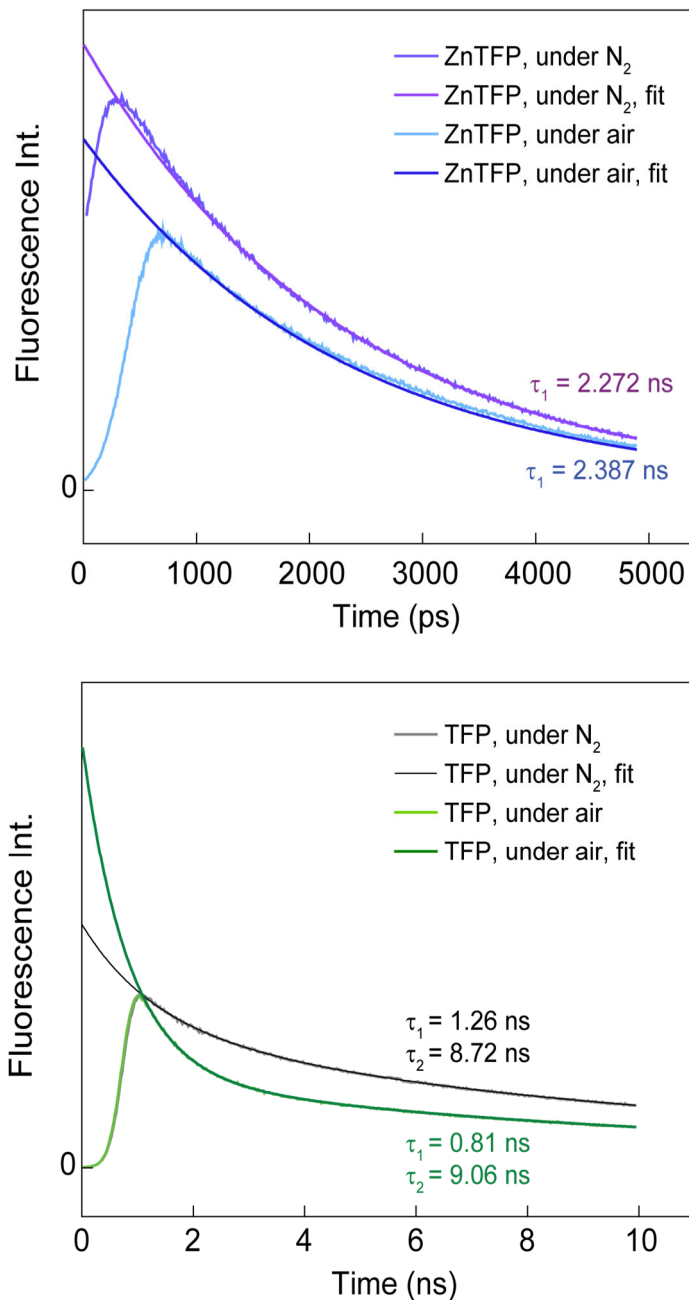

**Figure S3.** Lifetime decays of (top) Zn(II)TFP and (bottom) 2H-TFP emission in CH<sub>2</sub>Cl<sub>2</sub> under nitrogen and in the presence of air. The observed decay “fit” traces are monophasic for Zn(II)TFP and biphasic for 2H-TFP.

## D. Electrochemistry

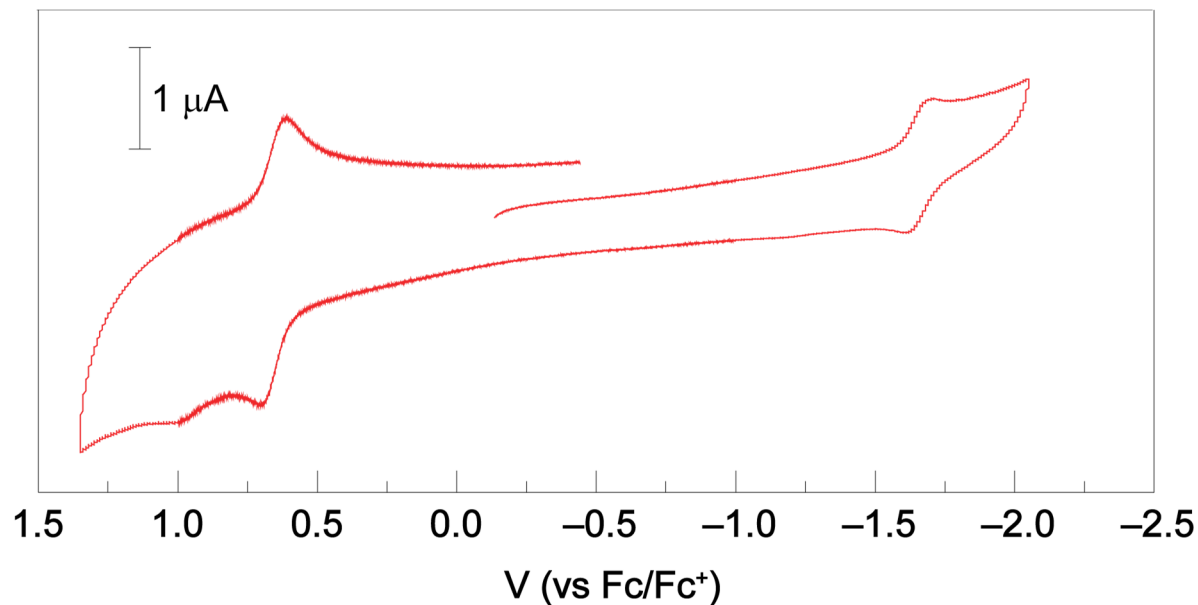

**Figure S4.** Cyclic voltammogram of Ni(II)TFP in CH<sub>3</sub>CN. CV was recorded with a glassy carbon button (3 mm diameter) working electrode, Pt auxiliary electrode and Ag wire reference electrode at a scan rate of  $v = 100 \text{ mV s}^{-1}$ .

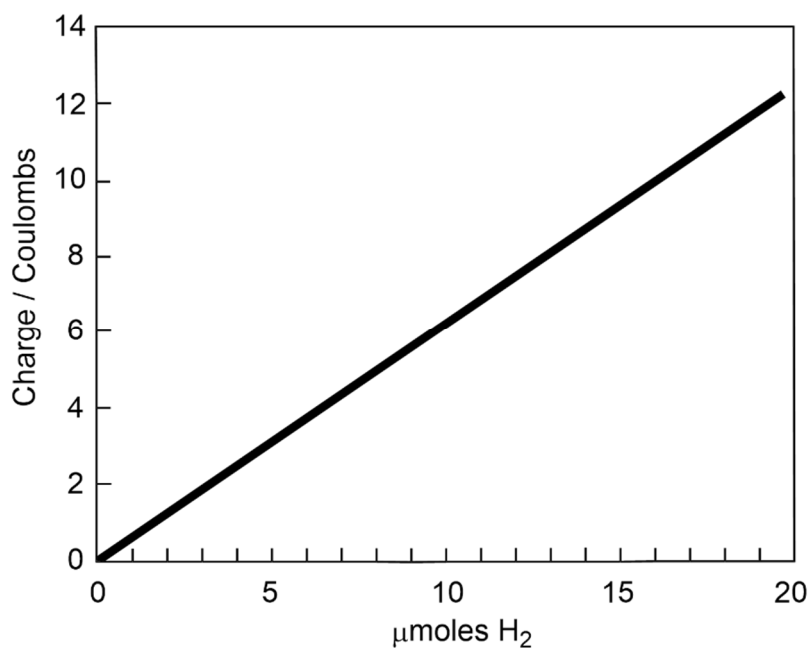

**Figure S5.** Plot of charge versus moles of H<sub>2</sub> generated by bulk electrolysis in conventional H-cell capped with rubber septums.

## E. HER Catalysis

**Table S2.** Parameters obtained from fits of linear scan voltammogram traces.

| [BzOH] / equiv | [BzOH] / mM | $i_{pl} / A^a$        | $TOF_{max} / s^{-1}{}^b$ | $k_{app} / M^{-1} s^{-1}{}^c$ |
|----------------|-------------|-----------------------|--------------------------|-------------------------------|
| 2              | 1.2         | $3.63 \times 10^{-5}$ | 7.87                     | $6.56 \times 10^3$            |
| 4              | 2.4         | $4.79 \times 10^{-5}$ | 13.7                     | $5.70 \times 10^3$            |
| 6              | 3.6         | $5.83 \times 10^{-5}$ | 20.3                     | $5.63 \times 10^3$            |
| 8              | 4.8         | $6.51 \times 10^{-5}$ | 25.3                     | $5.28 \times 10^3$            |

<sup>a</sup> Current values,  $i$ , estimated from LSV traces at the inflection point prior to increase in background current of LSV traces. Current values were taken from LSV traces corrected for capacitive current at  $-1.0$  V vs Fc<sup>+</sup>/Fc. <sup>b</sup> Calculated from eq (2) in main text for  $S = 0.0707$  cm<sup>2</sup>,  $C_{Cu}^0 = [Cu(II)TFP] = 0.6$  mM and the diffusion constant for Cu(II)TFP to be  $D_{Cu} = 5 \times 10^{-6}$  cm<sup>2</sup> s<sup>-1</sup>. <sup>c</sup> Calculated from eq (3) in main text.

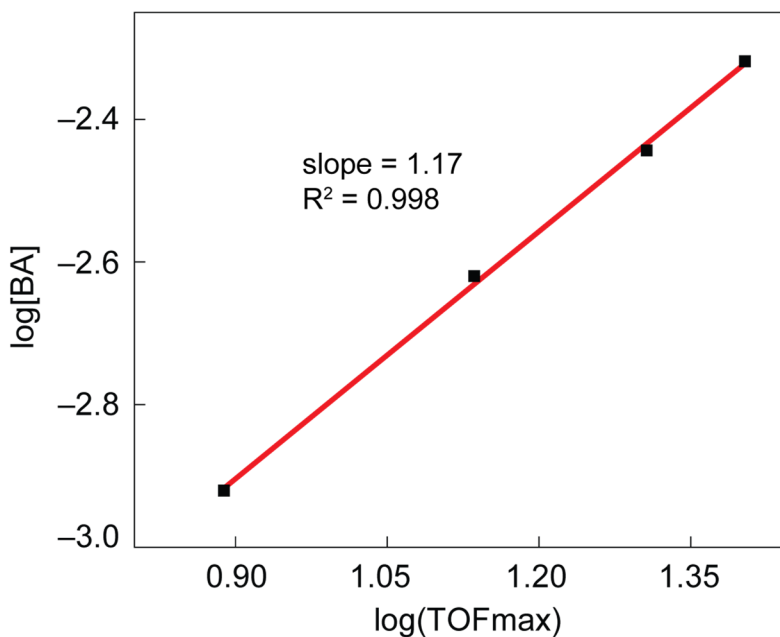

**Figure S6.** Plot to provide reaction order of proton concentration on HER catalysis.
